## RESEARCH ARTICLE

# Revisiting the sialome of the cat flea *Ctenocephalides felis*

Stephen Lu<sup>1\*</sup>, Monika Danchenko<sup>2</sup>, Kevin R. Macaluso<sup>2</sup>, José M. C. Ribeiro<sup>1</sup>

**1** Laboratory of Malaria and Vector Research, National Institute of Allergy and Infectious Diseases, National Institutes of Health, Bethesda, Rockville, Maryland, United States of America, **2** Department of Microbiology and Immunology, University of South Alabama College of Medicine, Mobile, Alabama, United States of America

\* [stephen.lu@nih.gov](mailto:stephen.lu@nih.gov)

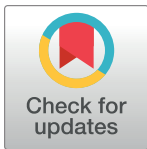

## OPEN ACCESS

**Citation:** Lu S, Danchenko M, Macaluso KR, Ribeiro JMC (2023) Revisiting the sialome of the cat flea *Ctenocephalides felis*. PLoS ONE 18(1): e0279070. <https://doi.org/10.1371/journal.pone.0279070>

**Editor:** Joshua B. Benoit, University of Cincinnati, UNITED STATES

**Received:** August 25, 2022

**Accepted:** November 29, 2022

**Published:** January 17, 2023

**Copyright:** This is an open access article, free of all copyright, and may be freely reproduced, distributed, transmitted, modified, built upon, or otherwise used by anyone for any lawful purpose. The work is made available under the [Creative Commons CC0](https://creativecommons.org/licenses/by/4.0/) public domain dedication.

**Data Availability Statement:** The transcriptome data was deposited to the National Institute for Biotechnology Information (NCBI) under Bioproject PRJNA850944 and Biosample accession SAMN29207207. The raw reads were deposited to the Short Reads Archive of the NCBI under accession SRR19752890, and the CDS deposited to the Transcriptome Shotgun Assembly (TSA) under accession GKAT00000000. The raw proteomic data was deposited to the ProteomeXchange platform under accession number PDX034807. We have contacted NCBI

## Abstract

The hematophagous behaviour emerged independently in several instances during arthropod evolution. Survey of salivary gland and saliva composition and its pharmacological activity led to the conclusion that blood-feeding arthropods evolved a distinct salivary mixture that can interfere with host defensive response, thus facilitating blood acquisition and pathogen transmission. The cat flea, *Ctenocephalides felis*, is the major vector of several pathogens, including *Rickettsia typhi*, *Rickettsia felis* and *Bartonella* spp. and therefore, represents an important insect species from the medical and veterinary perspectives. Previously, a Sanger-based sialome of adult *C. felis* female salivary glands was published and reported 1,840 expressing sequence tags (ESTs) which were assembled into 896 contigs. Here, we provide a deeper insight into *C. felis* salivary gland composition using an Illumina-based sequencing approach. In the current dataset, we report 8,892 coding sequences (CDS) classified into 27 functional classes, which were assembled from 42,754,615 reads. Moreover, we paired our RNAseq data with a mass spectrometry analysis using the translated transcripts as a reference, confirming the presence of several putative secreted protein families in the cat flea salivary gland homogenates. Both transcriptomic and proteomic approaches confirmed that FS-H-like proteins and acid phosphatases lacking their putative catalytic residues are the two most abundant salivary proteins families of *C. felis* and are potentially related to blood acquisition. We also report several novel sequences similar to apyrases, odorant binding proteins, antigen 5, cholinesterases, proteases, and protease inhibitors, in addition to putative novel sequences that presented low or no sequence identity to previously deposited sequences. Together, the data represents an extended reference for the identification and characterization of the pharmacological activity present in *C. felis* salivary glands.

## Introduction

Fleas are small, hematophagous insects classified in the order Siphonaptera that contains over 2,500 known species that can parasitize a wide range of mammals and birds [1, 2]. Fleas live in

AND PRIDE databases to release the data as soon as possible and we are currently waiting for them.

**Funding:** JMCR was supported by the Intramural Research Program of the Division of Intramural Research, National Institute of Allergy and Infectious Diseases (NIAID), National Institutes of Health (NIH)(AI000810-23). Additional support was obtained from the NIH/NIAID Extramural Research Program by KRM (AI22672). The funders had no role in study design, data collection and analysis, decision to publish, or preparation of the manuscript.

**Competing interests:** The authors have declared that no competing interests exist.

close association with their hosts and have evolved unique morphological traits to assist their survival. Their laterally flat body facilitates their movement through the host fur and feathers, and they also possess ctenidia, sclerotized setae on their body and legs that aid in preventing their unwanted dislodgment from the host. Other key adaptations include the ability to jump over great distances and, as adults, the presence of specialized mouthparts that facilitate piercing of the host skin [2].

From a medical perspective, fleas have shaped human history as vectors of the Gram-negative bacterium *Yersinia pestis*, the causative agent of the bubonic plague, that substantially reduced the human population in the past [3, 4] and continues to be a burden today as cases are still reported in Africa, USA, South America and Asia [5, 6]. Additionally, fleas are also implicated in the transmission of other pathogens, such as *Rickettsia typhi* (murine fever), *Bartonella henselae* (cat-scratch disease) and *Rickettsia felis* (flea-borne spotted fever) [7, 8], taxing human health. Because fleas live in close association with their host and can efficiently feed on a wide variety of vertebrates [9], they pose a significant threat to companion animals and, therefore, are also relevant from veterinary and economic perspectives [10].

Blood acquisition is a pharmacological endeavour for any hematophagous arthropod. To succeed, the blood feeder must overcome a plethora of defensive mechanisms deployed by its host. Upon piercing the host skin, a complex signalling pathway will trigger the coagulation cascade, platelet activation, vasoconstriction as well as inflammatory and antimicrobial responses. The deep RNA sequencing of salivary glands paired with the structural and functional characterization of salivary proteins established that hematophagous arthropods convergently evolved different mixtures of salivary proteins (sialomes) that can modulate and interfere with the host responses [11]. In addition to facilitating blood acquisition, it was also demonstrated that vector saliva can enhance pathogen transmission [11–14], inspiring the use of salivary proteins for vaccine development [15].

Despite its importance, the pharmacological activity of flea saliva has been understudied when compared to other hematophagous vectors (e.g., ticks, mosquitoes, sand flies and triatomines) and, so far, only a few molecules have been functionally characterized [16–19]. Additionally, although the *C. felis* genome was recently described [20], there is an overall lack of knowledge regarding the composition of *C. felis* salivary glands with the exception of a single Sanger-based sialome [21]. Here we revisit the *C. felis* sialome using an Illumina-based approach paired with mass spectrometry analysis of the flea salivary gland homogenates. Together, the data presented here expands the current repertoire of flea salivary proteins and serves as a foundation for further studies aimed at the identification and characterization of the as yet unknown pharmacological activity present in *C. felis* salivary glands.

## Materials and methods

### *C. felis* salivary gland collection

A population of EL cat fleas (Elward II Laboratory colony, Soquel, CA) was maintained at the University of South Alabama College of Medicine under standardized insectary conditions as previously described [7]. For the collection of flea salivary glands, 200–220 newly emerged, mixed-sex (ratio 1:1) adult fleas were fed defibrinated bovine blood (HemoStat Laboratories, USA) in an artificial feeding system [22]. After feeding for five consecutive days, female fleas were collected and cleaned by sequential surface washing with 10% bleach for 2 min, 70% ethanol for 2 min, followed by rinsing with sterile distilled water three times for 2 min. Fleas were then immobilized on ice, and salivary glands were dissected under a standard stereomicroscope in 0.01 M sterile phosphate-buffered saline (PBS) pH 7.2 (Gibco, USA) on a glass depression slide [23].

For transcriptomic analysis, 188 pairs of intact fed female salivary glands were pooled in RNAlater solution (Ambion, USA) and incubated at 4°C for two days, then stored at -80°C until further processing. For proteomic analysis, 220 pairs of intact salivary glands were collected in sterile PBS pH 7.2 on ice and frozen at -80°C shortly after microdissection.

### RNA extraction, Illumina sequencing and (data) analysis

Total RNA was extracted from the fed female *C. felis* salivary glands with the RNEasy isolation kit (QIAGEN, USA) according to the manufacturer's specifications and analyzed with an Agilent 2100 Bioanalyzer (Agilent, USA). The library was constructed using the NEBNextUltra™ II Directional RNA Library Prep Kit and sequencing was performed in an Illumina Novaseq 6000 DNA sequencer (Illumina, USA). The Illumina reads were trimmed of the Illumina adapters and low-quality sequences ( $Q < 20$ ) using TrimGalore (<https://github.com/FelixKrueger/TrimGalore>), merged into a single file, and assembled using ABySS (2.3.1) [24] with  $k$  values from 25 to 95 (with increments of 10) in single stranded mode and Trinity (2.13.2) [25] in single stranded F mode. The assemblies from ABySS and Trinity were combined and filtered with the CD-HIT tool [26]. Coding DNA sequences (CDS) with open reading frames larger than 150 nucleotides were extracted based on BLASTp results to a subset of the non-redundant protein database and the TSA database and were selected if fragments shared  $\geq 70\%$  similarity with a matching protein. Additionally, all open reading frames (ORF's) starting with methionine and having 40 amino acids in length were submitted to the signalP program (v. 3.0); fragments that possessed a signal peptide were mapped to the ORF's, and the most 5' methionine leading to a signal peptide was selected as the starting methionine of the transcript coding for a putative secreted peptide [27]. To assess our assembly quality, the BUSCO (4.1.3) benchmark for universal single-copy orthologs using the Insecta database (2022-04-05) was used [28]. For annotation, we used an in-house program that scans a vocabulary of ~ 400 words and their order of appearance in the protein matches from BLASTp/rpsBLAST results with different databases (TSA, subset of the NR, refseq-invertebrate, refseq-vertebrate, MEROPS, PFAM and CDD), including their e-values and coverage. Relative quantification of each CDS was estimated using the TPM (transcripts per million) parameter by mapping the trimmed library reads to the extracted CDS using the RSEM tool [29], and the final annotated CDS was exported to a hyperlinked Excel spreadsheet.

### Mass spectrometry analysis

For the mass spectrometry analysis, 220 salivary gland pairs from fed *C. felis* adult females were pooled and homogenized in PBS pH 7.2 using a sterile pestle (Sigma, USA). The sample was centrifuged (10,000  $\times g$ , for 10 min at 4°C), the supernatant collected, and the total protein concentration determined using a BCA protein kit (PIERCE, USA) according to the manufacturer's instructions. An aliquot of the salivary gland homogenate containing 3  $\mu g$  of total protein was diluted in 50 mM HEPES pH 8.0 to a final volume of 30  $\mu l$ . The protein was reduced with 5 mM dithiothreitol for 40 min at 37°C. The samples were cooled to room temperature and alkylated with 15 mM iodoacetamide for 20 min. Then, 200 ng of trypsin were added, and samples were incubated for 15 h at 37°C. The pH was adjusted to approximately 2.5 with 10% trifluoroacetic acid (TFA) and samples were desalted and concentrated with Agilent OMIX10 tips (Agilent, USA). Peptides were eluted with 20  $\mu l$  of 0.1% TFA/50% acetonitrile (ACN) and dried under vacuum. The peptides were dissolved in 12  $\mu l$  of 0.1% formic acid (FA)/3% ACN and centrifuged at 18,000  $\times g$  for 5 min. The LC-MS experiment was performed using Orbitrap Fusion Lumos mass spectrometer (Thermo Fisher Scientific, USA) coupled to EASY nLC 1200 nano-liquid chromatography system (Thermo Fisher Scientific, USA). Peptides were first

bound to a PepMap C18 column (3  $\mu\text{m}$  particle, 100  $\text{\AA}$  pore, 75  $\mu\text{m}$  inner diameter, 2 cm length) then separated using an EASY-Spray analytical column (PepMap C18, 2  $\mu\text{m}$  particle, 100  $\text{\AA}$  pore, 75  $\mu\text{m}$  inner diameter, 25 cm length) using a linear gradient of 0 to 40% ACN containing 0.1% FA for 100 min, followed by 40–80% for 5 min, 80% hold for 5 min, 80–0% for 5 min, and 0% hold for 5 min. Data were acquired with a standard data-dependent acquisition strategy, in which the survey MS1 scan was done at least every 3 sec with the Orbitrap mass analyzer at 120,000 resolution. The MS2 scans were done with a linear ion trap mass analyzer for multiply charged precursor ions isolated with a 1.6 m/z window using a quadrupole and fragmented by CID at 35% collision energy. The EASY-IC internal calibration was utilized for Orbitrap scans, and the dynamic exclusion period was set at 60 sec. Tandem mass spectra were analyzed using the PatternLab for proteomics 4.0 platform [30]. A target-decoy database was prepared using the CDS obtained from the RNAseq analysis and searched using the Comet tool [31] implemented in PatternLab. The search space included all semi-tryptic peptide candidates and carbamidomethylation of cysteine was used as a static modification. Data were searched with a 50 ppm precursor ion tolerance and a 0.4 Da fragment ion tolerance. The validity of the peptide spectrum matches (PSMs) generated by Comet was assessed using the Search Engine Processor (SEPro) module from PatternLab. A cutoff score was established to accept a protein false discovery rate (FDR) of 1% based on the number of decoys. Results were post-processed to only accept PSMs with <10 ppm precursor mass error, and only proteins with at least one unique peptide were considered. The normalized spectral abundance factor (NSAF) was used to represent the relative abundance of proteins.

### Statistical analysis

The Spearman correlation between proteomic and transcriptomic relative quantifications was evaluated using the  $\text{Log}_2$  (NSAF  $\times 10^4$ ) and the  $\text{Log}_2$  TPM. The scatterplot and determination of the Spearman correlation coefficient (Rho) were calculated using the R programming language [32] with the *stats* package. Phylogenetic trees were constructed using the maximum likelihood method [33] with MEGA X [34], while the amino acid alignments were done with the Clustal Omega tool [35].

### Data availability

The transcriptome data was deposited to the National Center for Biotechnology Information (NCBI) under Bioproject PRJNA850944 and Biosample accession SAMN29207207. The raw reads were deposited to the Short Reads Archive of the NCBI under accession SRR19752890, and the CDS deposited to the Transcriptome Shotgun Assembly (TSA) under accession GKAT00000000. The raw proteomic data was deposited to the ProteomeXchange platform under accession number PDX034807.

## Results and discussion

### Overall description of *C. felis* sialotranscriptome and sialoproteome

Illumina-based RNA-sequencing of *C. felis* salivary glands resulted in 42,754,615 high quality reads. Our *de novo* assembly strategy produced 85,669 sequences from which 11,752 CDS were extracted based on their homology with previously deposited sequences or by the presence of a putative signal peptide. To assess the quality of our assembly, we performed the BUSCO analysis of completeness using the Insecta database as a reference. The current dataset displayed a completeness of 80.7% (76.5% single and 4.2% duplicated), 2.9% of fragmentation and 16.4% of missing sequences, which is within the range of previous genomic and transcriptome

assemblies [36–38]. For comparison, we conducted the same analysis using the *C. felis* genome assembly [20] and observed a completeness of 94% (49.5% single and 44.5% duplicated) with 0.5% of fragmented and 5.5% of missing sequences. Together, these analyses suggest no major bias in our assembly pipeline.

To estimate each CDS abundance, we mapped the trimmed reads to the extracted CDS using the RSEM tool. This resulted in an alignment of 39.5% of all reads; similar results were reported in previous sialome studies [37, 39, 40]. The remaining unmapped reads are potentially from the 5' and 3' UTR of the CDS, from non-coding RNA, or any sequence that failed to be extracted by not generating an ORF with at least 150 nucleotides, lacked a putative signal peptide, or failed to produce matches against previously deposited proteins.

For the functional annotation of the extracted CDS, we selected sequences with at least 150 nucleotides and TPM higher than one, resulting in 8,892 sequences. The annotated CDS were exported to a hyperlinked Excel spreadsheet that is currently available for download (S1 File). The annotated CDS were used as a reference database for the proteomic part of the study resulting in the identification of unique peptides from 902 proteins (S2 File). As observed in other sialomes from blood-feeding arthropods [39–41], the “secreted” class was the most abundant functional class in both transcriptomic and proteomic relative quantifications (Table 1), with 519 CDS accounting for 45.5% of all TPM and 107 proteins representing 21.3% of all quantified protein in the salivary gland homogenate. The second most abundant functional group in our transcriptome was the “unknown” group (1,052 sequences representing 13.4% of all transcripts) which comprises novel CDS since they have low or no sequence identity to previously deposited sequences, while the second most abundant functional class in our proteomic analysis was the “protein modification” class with 92 proteins accounting for 12.7% of all identified proteins.

A deeper insight into the “secreted” class revealed a high abundance of CDS similar to the FS-H family [42] with 87 CDS representing ~34% of all secreted transcripts. The second most abundant secreted protein families were CDS classified as “unknown” (108 CDS accounting for 33.5% of all secreted proteins), followed by the acid phosphatase family (35 CDS representing 15.6% of all secreted proteins) and the “unknown conserved” (161 CDS representing ~7.9%) group. Similar results were observed in our LC-MS analysis. Unique peptides from 27 members of the FS-H family were identified and, together, they accounted for 34.4% of all secreted proteins. The second most abundant salivary protein family was represented by the acid phosphatases consisting of 21.4% of all secreted proteins. Finally, the proteins classified as “unknown” and “unknown conserved” represented 11.6% and ~13.8% of all secreted proteins, respectively (Table 2). Together these four functional groups represent ~91% of all secreted CDS and 81% of all secreted identified proteins. A very similar composition was observed in the recent rodent flea, *Xenopsylla cheopis*, sialome, in which the acid phosphatases were found to be the most abundant salivary proteins, followed by the FS-H-like protein family [37], indicating an overall conservation of flea sialome composition.

A common caveat in RNA-seq transcriptome studies is the relation between the CDS quantification (TPM or FPKM) and the protein concentration in the sample. To address this question, we determined the Spearman correlation between the  $\text{Log}_2\text{TPM}$  and the  $\text{Log}_2\text{NSAF}$  ( $\text{Rho} = 0.5883$ ,  $p < 2.2 \times 10^{-16}$ , S1 Fig). A similar result was found when we determined the Spearman correlation of proteins belonging to the “secreted” class. The moderate and significant correlation between transcript and protein relative quantifications indicates that transcript levels are a reasonable measure to estimate protein concentration of salivary proteins from the cat flea.

It's important to note that the chromosome-level assembly of *C. felis* genome revealed an unprecedented level of genomic variability between fleas from the same colony, and variations

**Table 1. Functional classification and quantification of transcripts and proteins identified in *C. felis* salivary gland homogenates.**

| Class                              | Number of Contigs | TPM <sup>a</sup> (%) | Number of proteins | NSAF <sup>b</sup> (%) |
|------------------------------------|-------------------|----------------------|--------------------|-----------------------|
| Cytoskeletal                       | 274               | 0.42                 | 41                 | 2.81                  |
| Extracellular matrix/cell adhesion | 112               | 0.11                 | 12                 | 0.48                  |
| Immunity                           | 76                | 0.09                 | 6                  | 0.32                  |
| Metabolism, amino acid             | 137               | 4.36                 | 30                 | 2.28                  |
| Metabolism, carbohydrate           | 152               | 0.29                 | 16                 | 1.05                  |
| Metabolism, energy                 | 376               | 1.72                 | 58                 | 7.65                  |
| Metabolism, intermediate           | 81                | 0.13                 | 4                  | 0.14                  |
| Metabolism, lipid                  | 248               | 0.35                 | 27                 | 1.29                  |
| Metabolism, nucleotide             | 142               | 0.2                  | 9                  | 0.28                  |
| Nuclear export                     | 36                | 0.02                 | 2                  | 0.08                  |
| Nuclear regulation                 | 342               | 0.32                 | 19                 | 1.78                  |
| Oxidant metabolism/detoxification  | 69                | 0.2                  | 15                 | 2.68                  |
| Proteasome machinery               | 305               | 0.74                 | 39                 | 2.24                  |
| Protein export machinery           | 484               | 1.23                 | 62                 | 4.06                  |
| Protein modification machinery     | 403               | 4.39                 | 92                 | 12.72                 |
| Protein synthesis machinery        | 370               | 11.18                | 102                | 11.60                 |
| <b>Secreted</b>                    | <b>519</b>        | <b>45.52</b>         | <b>107</b>         | <b>21.32</b>          |
| Signal transduction                | 871               | 1.69                 | 56                 | 3.57                  |
| Storage                            | 20                | 0.12                 | 6                  | 1.24                  |
| Transcription factor               | 32                | 0.05                 |                    | -                     |
| Transcription machinery            | 1,309             | 1.53                 | 70                 | 4.39                  |
| Transporters/storage               | 276               | 0.71                 | 21                 | 0.69                  |
| Transposable element               | 206               | 0.09                 |                    |                       |
| Unknown                            | 1,052             | 13.37                | 77                 | 9.39                  |
| Unknown, conserved                 | 992               | 11.17                | 31                 | 7.94                  |
| Viral                              | 8                 | 0.01                 |                    |                       |
| Total                              | 8892              |                      | 902                |                       |

<sup>a</sup>TPM: Transcripts per million

<sup>b</sup>NSAF: Normalized spectral abundance factor

<https://doi.org/10.1371/journal.pone.0279070.t001>

up to 118 Mb were observed between two individuals [20]. This observation has a direct impact on the interpretation of the current data as our samples originated from pooled salivary glands. Additionally, the pooled sample used for the proteomic analysis was different from the one used in our transcriptome, impacting the overall correlation between the proteomic and transcriptomic quantifications. Moreover, the high variability of secreted protein sequences observed in the current study is probably not from a single flea but, instead, scattered among different individuals. Thus, the data presented here represent a common *core* of transcripts and proteins found in the salivary glands of the cat flea. In addition to the abundant FS-H and acid phosphatase families, we also reported here several sequences similar to the antigen 5-like, cholinesterase, apyrase, odorant-binding protein, peptidases, and peptidases inhibitors that were also found in the previous cat and rat flea sialomes [21, 37, 43].

### A deep insight into the core secreted salivary proteins of *C. felis*

In the section that follows, we present a discussion of the secreted protein families found in this study, focusing on the protein families identified in the LC-MS analysis and their possible role in blood acquisition.

**Table 2. Relative abundance of protein families found within the 'secreted' functional class.**

| Protein family                | Number of CDS | TPM (%) | No. proteins | NSAF (%) |
|-------------------------------|---------------|---------|--------------|----------|
| Acid phosphatases             | 35            | 15.5812 | 9            | 21.37    |
| Alpha macroglobulin           | 2             | 0.0044  | -            | -        |
| Amino peptidase               | 3             | 0.0023  | -            | -        |
| Angiotensin-converting enzyme | 1             | 0.0031  | -            | -        |
| Antigen 5                     | 15            | 4.762   | 8            | 5.24     |
| Apyrase                       | 10            | 0.7045  | 3            | 2.21     |
| Aspartic peptidase            | 1             | 0.0027  | 1            | 1.94     |
| Cholinesterase                | 25            | 2.3271  | 7            | 4.36     |
| Cysteine peptidases           | 5             | 0.0116  | 4            | 0.78     |
| FS-H                          | 87            | 33.9826 | 27           | 34.42    |
| Hormone binding               | 4             | 0.013   | -            | -        |
| Inhibitor                     | 9             | 1.1078  | 4            | 1.84     |
| Lipases                       | 2             | 0.0009  | -            | -        |
| Mucin                         | 6             | 0.0042  | 1            | 0.28     |
| OBP                           | 6             | 0.0523  | 2            | 2.01     |
| Serine peptidases             | 9             | 0.0049  | 1            | 0.16     |
| Unknown                       | 108           | 33.5562 | 13           | 11.60    |
| Unknown, conserved            | 161           | 7.8792  | 23           | 13.78    |

<https://doi.org/10.1371/journal.pone.0279070.t002>

**FS-H / FS-I.** Members of this protein family possess eight cysteine residues, including a C-X-C C-terminus motif (Fig 1), and these were first reported as the major salivary antigen of the cat flea [44, 45]. Interestingly, when comparing sialomes studies, it seems that the FS-H protein family is unique to fleas since they have not been identified in other blood-feeding vectors, such as ticks, flies, mosquitoes or kissing bugs [46]. Yet, a conserved 6-cysteines framework can be found between the FS-H family, insect defensins and scorpion toxins [47], suggesting a similar fold and potential role for the FS-H-like proteins. In the previous *C. felis* sialome, several FS-H-like proteins were found and accounted for most of the secreted proteins identified when considering the number of clones sequenced as a quantitative measurement [21]. Corroborating this finding, our transcriptomic and proteomic analyses revealed that the FS-H-like proteins are the most abundant salivary protein family of *C. felis*. Here we identified 87 CDS belonging to this protein family with a wide range of TPM values (2.11–58,813) (S1 File) that accounted for almost 34% of all secreted transcripts. Likewise, our LC-MS analysis identified unique peptides from 27 FS-H-like proteins representing 34.4% of all secreted proteins quantified (Table 2).

Two members of this salivary protein family (FS50 and FS48) have been functionally characterized and these were initially identified from the rat flea sialome [43]. Functional and structural studies with FS50 revealed a core structure similar to that of scorpion toxins. Moreover, it was demonstrated that FS50 blocks the Na<sub>v</sub>1.5 sodium channel [17]. Similarly, FS48 was shown to act as an immunomodulator of T cells by blocking the voltage-gated potassium channel K<sub>v</sub>1.3 [18, 48]. Despite the above-mentioned evidence, FS50 and FS48 channel blocking mechanism is still unclear, because the key residues responsible for this activity in the scorpion toxins are absent in the FS-H members. In addition to their channel blocking activity, the FS-H-like proteins also appear to be related to *R. felis* infection. A recent study evaluated the temporal expression pattern of four FS-H-like transcripts (Cf-169, Cf-65, Cf-12 and Cf-75) in different time points post-infection [23]. In the current dataset we found that CDS contig\_5185 was almost identical (96.3%) to Cf-12 (S2 Fig), and unique peptides from contig\_5185

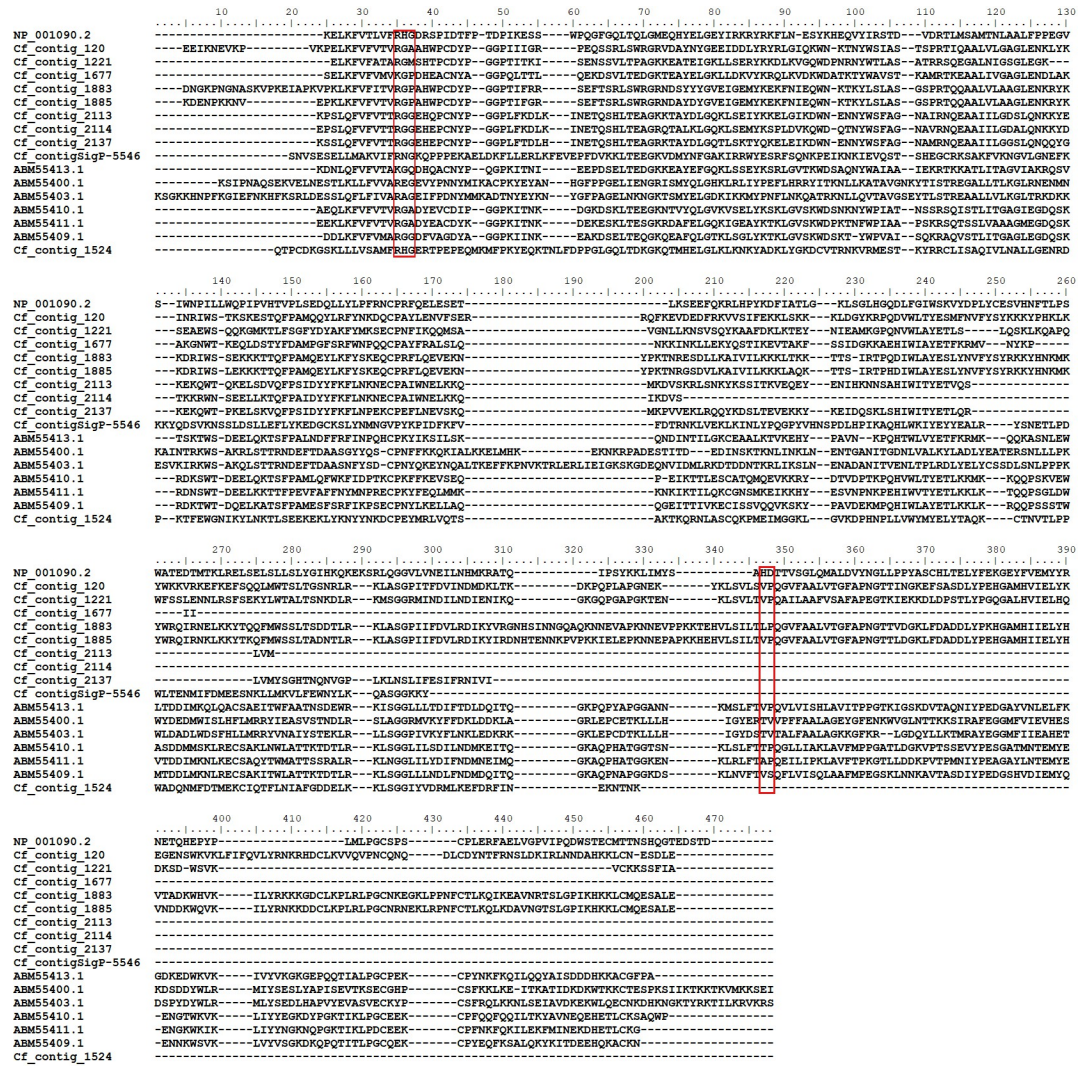

**Fig 1. Amino acid alignment of members of the FS-H protein family.** Sequences from *C. felis* salivary glands (Cf\_contig\_XXXX) detected by LC-MS analysis with previously deposited identified FS-H members from the rat flea *X. cheopis* (Xc\_XXX and ABMXXXXX) and scorpion toxins from *Centruroides noxius* (sp|P15223), *Tityus obscurus* (sp|H1ZZ14), *Mesobuthus martensii* (sp|P15228), *Leiurus hebraeus* (sp|P0C519) and *Rhopalurus junceus* (sp|E7CLP2). The conserved cysteine residues are shaded in black.

<https://doi.org/10.1371/journal.pone.0279070.g001>

were also found in our LC-MS analysis, supporting the hypothesis that these two proteins are present in *C. felis* salivary glands (S2 File). Furthermore, BLASTp of Cf-169, Cf-65 and Cf-75 against the current dataset resulted in the identification of contig\_798 (89% identity), contig\_4556 (98% identity), contig\_8628 (64% identity), respectively. However, none of these sequences were identified in the mass spectrometry analysis.

A comparison of the primary structure of *C. felis* FS-H members with *X. cheopis* sequences revealed varying degrees of sequence similarity (21.6% - 89.6%). Additionally, the phylogenetic analysis using the translated sequences of those CDS identified by mass spectrometry analysis resulted in the formation of four major clades (S3 Fig), similar to the one reported in the first *C. felis* sialome [21]. Clades I and II contained a mixture of both rat and cat flea sequences including the sodium channel blocker FS50. Clade III is composed of three *X. cheopis* sequences, including FS48, and all selected scorpion toxins, while clade IV contained only *C.*



*felis* sequences. The low bootstrap values at the base of each clade in addition to the high abundance and variability between the FS-H members strongly suggest that this salivary protein family is under expansion, possibly resulting in proteins with different kinetic profiles. From the blood acquisition perspective, their presence in the flea saliva could ensure that different populations of channels are blocked during feeding, thus interfering with host nociception and immune signaling [49, 50]. However, considering the distant related clade IV (S3 Fig), we cannot discard the possibility that some FS-H-like proteins are acquiring new functions that are not related to their channel blocking activity, and future studies are required to uncover the role of the FS-H like proteins in blood acquisition and pathogen transmission. It's noteworthy, that due to the high genomic variability between individual fleas, we cannot exclude the possibility that some of the CDS's identified here are artefacts of our *de novo* assembly approach.

**The histidine acid phosphatase superfamily.** Acid phosphatases are enzymes widely distributed in plants and animals catalyzing the hydrolysis of phosphate monoesters in acidic conditions (pH 4–7) where two His residues have been shown to be essential for their catalytic mechanism. The first His residue is located in the RHG motif, which is conserved in all members of this protein family [51]. A small subset of this family are metallohydrolases, enzymes that present two metal ions in their catalytic center and are also known as purple acid phosphatases [52]. In addition to the flea sialomes, the acid phosphatases were also reported in the salivary glands of other hematophagous arthropods, including triatomines (males and females) [53] and ticks [54].

In the previous *C. felis* sialome, 21 contigs classified as acid phosphatases and representing 17% of all secreted CDS's were reported [21]. In our current dataset, we identified 35 CDS's belonging to the acid phosphatase family with variable TPM values (2.67–14,955) (S1 File), and that together accounted for 15.6% of all secreted proteins. Supporting this data, our LC-MS analysis also identified unique peptides from 9 acid phosphatases that accounted for 24% of all secreted proteins (Table 2) and were the second most abundant salivary protein family from *C. felis*. Interestingly, all previously reported sequences lacked the catalytic His residue, suggesting that the expected catalytic activity is absent. In the current dataset, 34 out of the 35 CDS's identified as acid phosphatases lacked the two His residues relevant to the monoester hydrolysis, while CDS contig\_1524, found in moderate levels in the *C. felis* salivary glands (TPM = 11,070) (S1 File), encoded one of the two His residues (Fig 2). However, unique peptides from contig\_1524 were not found in the proteome analysis (S2 File). Similar findings were also observed in the *X. cheopis* sialome, in which several CDS coding for acid phosphatases lacking the catalytic residues were found. Among those CDS, two putative acid phosphatases presented the catalytic motif RHG, although these CDS's were not observed in the mass spectrometry analysis of *X. cheopis* salivary glands homogenates at different time points [37]. Therefore, it is not clear if the *expected* catalytic activity of acid phosphatases is present in the flea saliva.

From the blood-feeding perspective, it was originally proposed that the absence of residues associated with enzymatic activity of *X. cheopis* phosphatases might lead to the protein being permanently bound to its natural substrate, or acting as a kratagonist molecule [37], a sequestering molecule that limits its substrate's availability [55]. This concept has been demonstrated in other blood-feeding arthropods (e.g., mosquitoes, ticks, sand flies and kissing bugs), in which a group of protein families was shown to bind to small agonists that play an important role in host homeostasis, including serotonin, epinephrine, histamine, nucleotides or eicosanoids [55]. In order to antagonize the hemostatic response triggered by such agonists it was speculated that the kratagonist must achieve a concentration between 0.2–2 $\mu$ M (the normal receptor saturating concentration of histamine, serotonin or ADP) [56]. In all cases reported

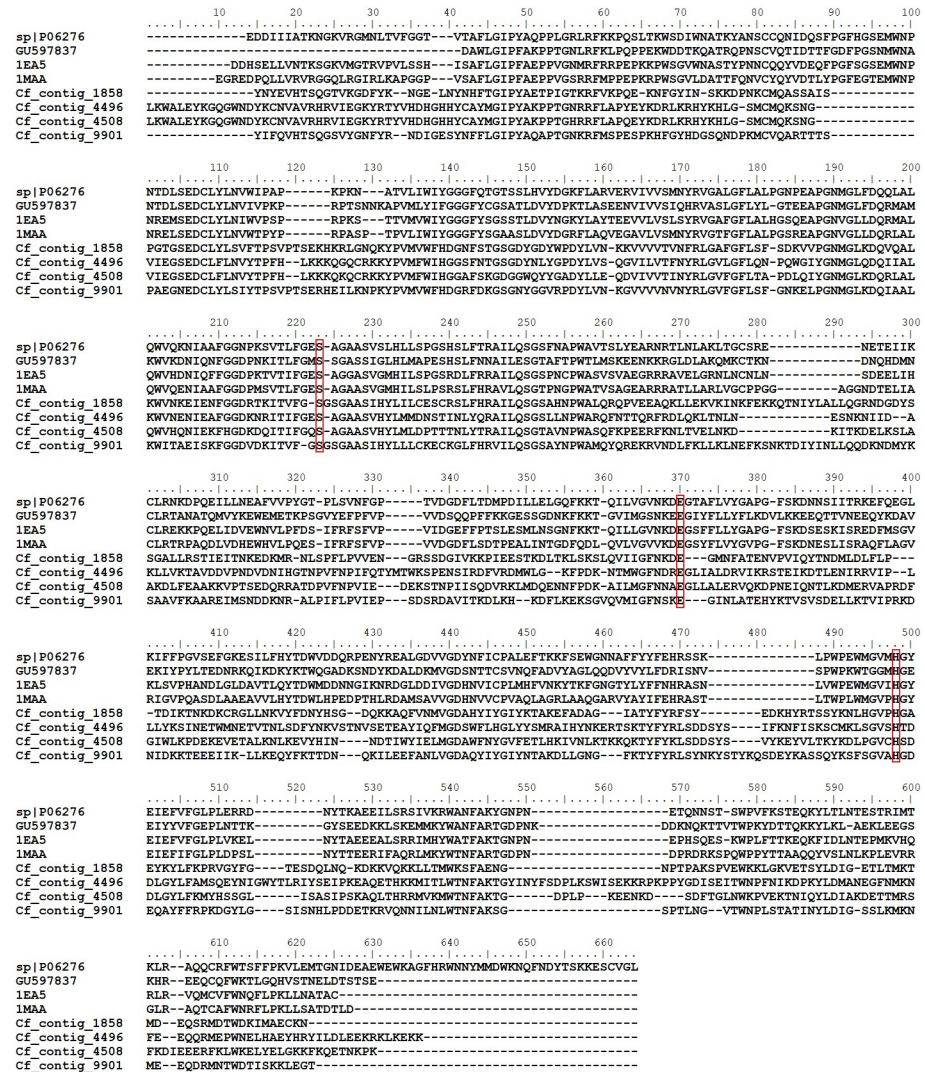

**Fig 2. Amino acid alignment acid phosphatases.** Human prostatic acid phosphatase (NP\_0011090.2) and acid phosphatases from *X. cheopis* (ABM55413.1, ABM55400.1, ABM55403.1, ABM55410.1, ABM55411.1, ABM55409.1) previously identified by mass spectrometry analysis in the flea salivary glands and *C. felis* acid phosphatases. The motifs containing the histidine residues relevant for the hydrolysis of phosphate monoesters are boxed in red.

<https://doi.org/10.1371/journal.pone.0279070.g002>

so far, this agonist sequestering protein family is also the most abundant protein family in the blood feeder salivary glands [57–60]. Therefore, it is plausible that these *pseudo-acid phosphatases* from fleas have a similar role.

Finally, despite the overall low identity observed between *X. cheopis* and *C. felis* salivary acid phosphatases, the lack of the catalytic residues, their high abundance and variety in both flea species suggest that these *pseudo-enzymes* have a conserved role in the salivary glands of fleas.

**Cholinesterase and esterases.** Cholinesterases and esterases belong to the carboxylesterase family (PFAM 00135) and present a catalytic triad composed of Ser, Asp and His residues [61, 62]. Members of these families are frequently reported in sialome studies, and their catalytic activity was demonstrated in the saliva and salivary gland homogenates of different blood-feeding arthropods [63, 64]. In the first cat flea sialome three truncated esterase-like

transcripts were reported [21]. Here we identified 25 CDS with TPM values from 1.13 to 3,036 with high sequence similarity to previously deposited cholinesterases and esterases (S1 File). Additionally, our mass spectrometry analysis of salivary gland homogenates identified unique peptides from six cholinesterase-like proteins, representing the 6<sup>th</sup> most abundant protein family (Table 2) and confirming they are present in the salivary glands.

It is not clear if such enzymes play a role in blood acquisition. To date, only one salivary cholinesterase has been characterized. In the bed bug *Cimex lectularius* the salivary cholinesterase (ClSChe) was shown to be present in the arthropod salivary ducts, strongly suggesting that the protein is secreted into the saliva. Additionally, it was demonstrated that, although the catalytic residues are conserved in ClSChe (Fig 3), the recombinant enzyme presented low catalytic efficiency towards acetylcholine (Ach) [65], suggesting that ClSChe act as a chelator of Ach. Acetylcholine is traditionally known as a neurotransmitter; yet, Ach has also been shown to play a role in immunity and inflammation [66], which could interfere with blood acquisition. Finally, it's important to note that Ach may not be the main target of these salivary cholinesterases. Therefore, future studies are necessary to uncover *C. felis* cholinesterases activity and physiological role.

**Antigen 5.** Antigen 5-like proteins, along with the Cysteine-rich secretory proteins and the Pathogenesis-related 1 proteins, compose the CAP superfamily. Members of this superfamily are commonly reported in different life forms [67]. They are the major components of vespid venom [68] and are considered toxins due to their ability to inhibit smooth muscle contraction [69]. The antigen 5-like proteins are commonly reported in sialome studies from blood-feeding arthropods [70–72], including the first *C. felis* sialome that reported two transcripts classified as antigen 5-like proteins [21]. Here we identified 15 CDS with high variability of TPM values (1.89–5,815), while LC-MS analysis identified the presence of unique peptides from 5 of them (Table 2).

From a functional perspective, only a handful of antigen 5-like proteins from hematophagous vectors have been characterized. In *Dipetalogaster maxima* and *Triatoma infestans*, antigen 5-like proteins show an antioxidant potential similar to superoxide dismutase, disrupting platelet aggregation induced by low concentrations of collagen [73]. In the horsefly *Tabanus*

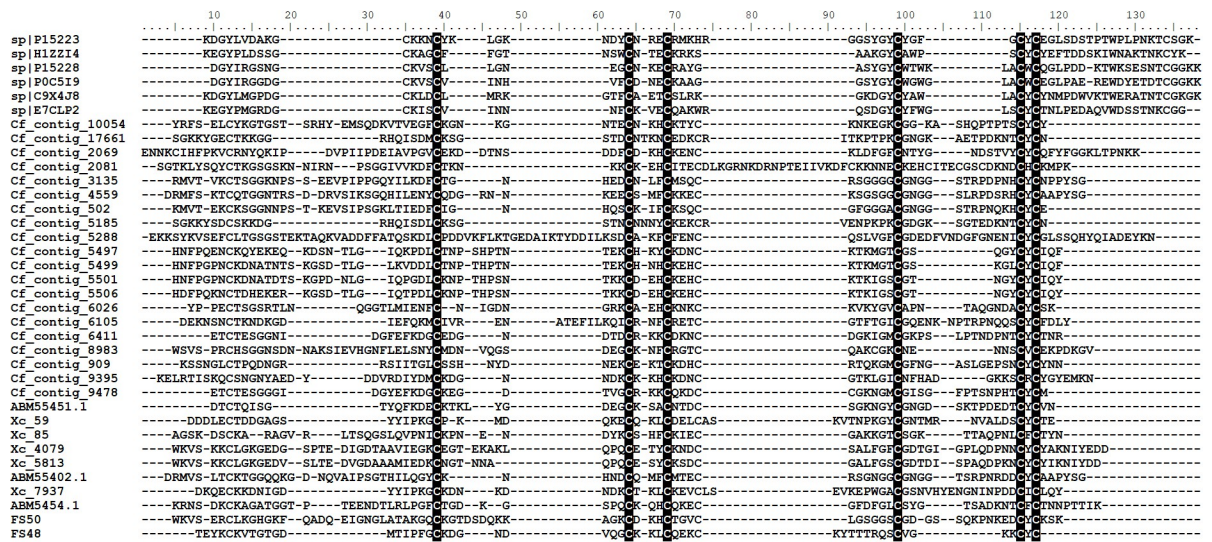

**Fig 3. Amino acid alignment of *C. felis* cholinesterases.** *C. felis* sequences found in the mass spectrometry analysis were aligned with sequences from *Torpedo californica* (1EA5), *Mus musculus* (1MAA), *Cimex lectularius* (GU597837) and the human (sp|P06276) cholinesterases. The catalytic triad residues Ser, Glu and His are red-boxed.

<https://doi.org/10.1371/journal.pone.0279070.g003>

*yao* antigen 5-like proteins isolated from the salivary glands interfere with thrombus formation, angiogenesis and platelet aggregation [74, 75]. Interestingly, in mosquitoes, antigen 5-like molecules have been reported in the sialome of both males and females, even though some transcripts were 10- and 100-fold upregulated in females [38, 76]. Together these results suggest that members of this family have multiple roles in vector biology, including blood acquisition. Interestingly, the triatomine antigen 5 protein DMAV [77] has an alkaline pI, as do the female-enriched antigen 5 proteins of mosquitoes (but not the male-abundant antigen 5 proteins) [76, 78]. Of the 15 proteins identified as members of the Antigen 5 family, 14 have pI's estimated at higher than 9.3, except for contig\_14784, which has a pI of 5.8 and is the least expressed member of the family. It is tempting to speculate that the positive surface charge may act as a bait to increase local concentration of  $O_2^-$  anions.

**Apyrases.** Apyrases are enzymes that catalyze the hydrolysis of ADP and ATP to AMP [79] and are ubiquitously found in hematophagous arthropods, including ticks [80], kissing bugs [81], mosquitoes [82, 83] and fleas [84, 85]. Apyrases are currently divided into three sub-families: the 5'-nucleotidase, *Cimex*-type and the CD-39 type [86]. It is worth noting that, among hematophagous vectors, apyrases from the CD-39 sub-family have only been reported in fleas [21, 43]. Functionally, apyrases have been shown to inhibit ADP-induced platelet aggregation [87, 88], facilitating blood acquisition. Additionally, phylogenetic analysis of apyrases from several blood-feeding vectors suggests that members of this protein family were selected independently through the course of a convergent evolution scenario [86], highlighting their importance for blood-feeding.

In the current dataset, we identified 10 transcripts classified as apyrase-like, 4 from the CD-39 sub-family and 6 belonging to the 5'-nucleotidase sub-family (S1 File). Our LC-MS analysis of salivary glands homogenates identified unique peptides from two CD-39 apyrases and one 5'-nucleotidase (S2 File). Similar to the findings of the rat flea, *X. cheopis* [37], both transcriptomic and proteomic analyses suggest that *C. felis* CD-39 apyrases are the most abundant apyrases in the cat flea and probably the main enzyme responsible for the degradation of ADP and ATP. It is possible that the flea salivary 5'-nucleotidase enzymes may function in the hydrolysis of AMP and adenine dinucleotides as was shown for the salivary 5'-nucleotidase of the sand fly *Lutzomyia longipalpis* [89].

**Peptidase inhibitors.** Peptidase inhibitors, mainly serine and cysteine peptidases, are ubiquitously reported in the sialome from hematophagous arthropods [11]. In our transcriptome analysis of *C. felis* salivary glands, we identified 8 transcripts annotated as serine peptidase inhibitors belonging to the Kazal, pacifastin, serpin and trypsin inhibitor-like (TIL) families with TPM values ranging from 2.2 to 4,866 (S1 File). In addition, our LC-MS analysis also revealed the presence of unique peptides from three of them (Table 2).

Salivary peptidase inhibitors from blood-feeding vectors are usually associated with the modulation of host immune response and homeostasis. As a rule of thumb, peptidase inhibitors that interfere with blood clotting usually do so by targeting factor Xa or thrombin, which are shared by both intrinsic and extrinsic pathways. In mosquitoes, it was demonstrated that the saliva of anophelines inhibits thrombin, while the saliva of culicine targets factor Xa [90]. Factor Xa and thrombin inhibitors were also reported in ticks [91], sand flies [92] and kissing bugs [93], suggesting that at least one anticoagulant molecule is present in the saliva of hematophagous arthropods. In fleas, only one thrombin inhibitor was recently characterized. XC-43 from the rat flea *Xenopsylla cheopis* inhibits thrombin with high affinity ( $K_i = 10$  pM) and interferes with blood coagulation *in vitro* and *in vivo*. Additionally, the crystal structure of XC-43 complexed with thrombin reveals that XC-43 is not cleaved by the enzyme [19]. Interestingly, BLASTp of XC-43 against the *C. felis* genome and the current transcriptome dataset failed to produce significant *hits*, indicating that a similar molecule is absent in *C. felis* salivary

gland homogenates. It's possible that one of the three serine peptidase inhibitors identified in the LC-MS analysis is a thrombin or factor Xa inhibitor. Another possibility is the presence of a novel anticoagulant molecule in the cat flea salivary glands.

**Odorant-binding protein (OBP).** OBPs are proteins that usually display a hydrophobic binding pocket and are associated with the transport of small molecules related to insect chemoreception. Currently, insect OBPs are classified into 4 sub-families based on their size and number of cysteine residues [94], and, structurally, they are constituted by a core structure composed of six  $\alpha$ -helices that encloses the hydrophobic pocket [95]. In the current dataset, we identified six transcripts containing an OBP domain with relatively low TPM values (2–210) (S1 File), and unique peptides from only two of them (contig\_45922 and contig\_30935) were observed in our LC-MS analysis (S2 File). Both proteins were classified as a classical OBP containing 6 cysteine residues and a molecular weight near 14 kDa. The low overall abundance of these OBPs is probably the reason why they were not identified in the previous *C. felis* sialome, which used a Sanger-based approach [21].

In addition to salivary glands, OBPs are also commonly found in the insect's sensory organs, where they have a key role in the insect's ability to identify potential hosts, mating partners and food [96]. In the salivary gland, OBP's role in blood-feeding is better understood in mosquitoes where several members of a multi-gene family named D7 have been functionally and structurally characterized. The D7 are the most abundant salivary protein of mosquitoes and function as *kratagonists*, binding to serotonin, epinephrine, histamine, and cysteinyl-leukotrienes [97, 98]. Histamine and serotonin dose response curves attain saturation levels at up to several micromolar for platelet aggregation or smooth muscle contraction assays. However, other agonists such as thromboxane  $A_2$  and leukotrienes are active at 10-fold smaller concentrations. Considering the low overall abundance of *C. felis* OBPs, it is possible that they target these lipidic agonists.

**Unknown proteins.** Members of this protein “family” are sequences that we failed to classify and are simply named here as “unknown”. In our annotation strategy, we further subclassify *unknown* proteins into two groups: the *unknown conserved* class comprises sequences that have high similarity with previously deposited proteins of no known function, while the *unknown* class contains potential novel sequences since they have low or no sequence identity to deposited sequences. It's important to note that because our sequences originated from a *de novo* assembly strategy, we cannot discard the possibility that some of the sequences under this “family” are artefacts of our assembly strategy and not true CDS, and, therefore, the data must be carefully interpreted.

In our analysis, we classified 108 putative secreted CDS in the *unknown* group, accounting for 33.5% of the TPM, while our LC-MS identified unique peptides from 13 of them, representing 11.6% of all identified proteins (Table 2). Additionally, 161 CDS (~7.9%) and 23 proteins (~13.8%) were classified as *unknown conserved* (Table 2). Together, they represent 41.4% of all secreted transcripts and ~25.4% of all secreted proteins (Table 2). These values are similar to those found in other sialomes [37, 38, 40, 76] and perhaps reflect a hidden pharmacological potential existing within the salivary glands of hematophagous vectors.

## Conclusion

Ten years ago, a Sanger-based sialome of *C. felis* reported 806 contigs, of which 91 encoded for putative secreted proteins, providing a glimpse into the cat flea salivary gland composition [21]. Here, using an Illumina-based RNA-seq approach, we reported 8,892 total CDS, of which 519 were annotated as potentially secreted proteins, providing a more comprehensive insight into *C. felis* salivary contents. Additionally, we paired our transcriptome study with a mass

spectrometry analysis of salivary gland homogenates, confirming the presence of several putative secreted proteins in the tissue. Together, the data reported here represents an extended reference for future studies interested in characterizing *C. felis* salivary proteins and their potential role in blood acquisition.

### Future direction

With the advances in sequencing technologies, the full omics analysis (i.e., genome, transcriptome, and proteome) of a single flea has become a feasible task and will be a key effort to understand the underlying mechanisms responsible for such individual variation. The application of this individual omics approach to other hematophagous arthropods (e.g., ticks, mosquitoes, sand flies and kissing bugs) might also provide useful insights into the independent evolution of the hematophagous behavior.

### Supporting information

**S1 Fig. Spearman correlation of the RNAseq and proteomic relative quantifications.** Scatter plot of the Log<sub>2</sub>NSAF by the Log<sub>2</sub>TPM (A) from all proteins identified by the LC-MS analysis and (B) only from the *matches* classified into the secreted functional class. A general linear model was fitted to the data (blue line) and the Spearman correlation was calculated. (PDF)

**S2 Fig. Amino acid alignment of Cf-12 and contig\_5185.** Cf-12 was identified in the previous *C. felis* sialome and contig\_5185 is from the current dataset. The putative signal peptide is underscored, the distinct residues between the two sequences are red-boxed and the cysteine residues are blue-boxed. (PDF)

**S3 Fig. Phylogenetic tree of the FS-H-like proteins.** Sequences from *C. felis*, *X. cheopis* and scorpion toxins were used and the tree was constructed using the Maximum likelihood model. The number at the bases of the branches represents the concordance between 500 bootstraps replicates. (PDF)

**S1 File. The hyperlinked excel spreadsheet of the annotated CDS's and the associated files.** The file can be downloaded from the following link: [https://proj-bip-prod-publicread.s3.amazonaws.com/transcriptome/C\\_felis/sialome\\_2022/cf.zip](https://proj-bip-prod-publicread.s3.amazonaws.com/transcriptome/C_felis/sialome_2022/cf.zip). (TXT)

**S2 File. Excel spreadsheet containing the summarized results from the LC-MS analysis of *C. felis* salivary gland homogenates.** The file can be downloaded from the following link: [https://proj-bip-prod-publicread.s3.amazonaws.com/transcriptome/C\\_felis/sialome\\_2022/cf.zip](https://proj-bip-prod-publicread.s3.amazonaws.com/transcriptome/C_felis/sialome_2022/cf.zip). (TXT)

### Acknowledgments

The authors thank Glenn Nardone, Motoshi Suzuki, and Lisa (Renee) Olano from the Research Technology Branch (NIAID/NIH) for mass spectrometry analysis. This work utilized the computational resources of the NIH HPC Biowulf cluster (<http://hpc.nih.gov>).

## Author Contributions

**Conceptualization:** Stephen Lu, José M. C. Ribeiro.

**Data curation:** Stephen Lu, Monika Danchenko, Kevin R. Macaluso, José M. C. Ribeiro.

**Formal analysis:** Stephen Lu, Monika Danchenko, José M. C. Ribeiro.

**Funding acquisition:** Kevin R. Macaluso, José M. C. Ribeiro.

**Investigation:** Stephen Lu, Monika Danchenko, José M. C. Ribeiro.

**Methodology:** Stephen Lu, Monika Danchenko, Kevin R. Macaluso, José M. C. Ribeiro.

**Writing – original draft:** Stephen Lu.

**Writing – review & editing:** Stephen Lu, Monika Danchenko, Kevin R. Macaluso, José M. C. Ribeiro.

## References

1. Rust MK, Dryden MW. The biology, ecology, and management of the cat flea. *Annu Rev Entomol*. 1997; 42:451–73. Epub 1997/01/01. <https://doi.org/10.1146/annurev.ento.42.1.451> PMID: 9017899.
2. Durden LAaH, Fleas N.C. (Siphonaptera). *Medical and Veterinary Entomology*. Third ed: Academic Press; 2019. p. 145–69.
3. Perry RD, Fetherston JD. *Yersinia pestis*—etiologic agent of plague. *Clin Microbiol Rev*. 1997; 10(1):35–66. Epub 1997/01/01. <https://doi.org/10.1128/CMR.10.1.35> PMID: 8993858; PubMed Central PMCID: PMC172914.
4. Barbieri R, Signoli M, Cheve D, Costedoat C, Tzortzis S, Aboudharam G, et al. *Yersinia pestis*: the Natural History of Plague. *Clin Microbiol Rev*. 2020; 34(1). Epub 2020/12/11. <https://doi.org/10.1128/CMR.00044-19> PMID: 33298527; PubMed Central PMCID: PMC7920731.
5. Andrianaivoarimanana V, Piola P, Wagner DM, Rakotomanana F, Maheriniaina V, Andrianalimanana S, et al. Trends of Human Plague, Madagascar, 1998–2016. *Emerg Infect Dis*. 2019; 25(2):220–8. Epub 2019/01/23. <https://doi.org/10.3201/eid2502.171974> PMID: 30666930; PubMed Central PMCID: PMC6346457.
6. Campbell SB, Nelson CA, Hinckley AF, Kugeler KJ. Animal Exposure and Human Plague, United States, 1970–2017. *Emerg Infect Dis*. 2019; 25(12):2270–3. Epub 2019/11/20. <https://doi.org/10.3201/eid2512.191081> PMID: 31742515; PubMed Central PMCID: PMC6874267.
7. Reif KE, Kearney MT, Foil LD, Macaluso KR. Acquisition of *Rickettsia felis* by cat fleas during feeding. *Vector Borne Zoonotic Dis*. 2011; 11(7):963–8. Epub 2011/01/11. <https://doi.org/10.1089/vbz.2010.0137> PMID: 21214386; PubMed Central PMCID: PMC3129644.
8. Macaluso KR, Pornwiroon W, Popov VL, Foil LD. Identification of *Rickettsia felis* in the salivary glands of cat fleas. *Vector Borne Zoonotic Dis*. 2008; 8(3):391–6. Epub 2008/04/11. <https://doi.org/10.1089/vbz.2007.0218> PMID: 18399779; PubMed Central PMCID: PMC2978049.
9. Khokhlova IS, van der Mescht L, Warburton EM, Stavtseva NA, Krasnov BR. Adaptation to a novel host and performance trade-off in host-generalist and host-specific insect ectoparasites. *Insect Sci*. 2022; 29(2):567–80. Epub 2021/05/29. <https://doi.org/10.1111/1744-7917.12929> PMID: 34048132.
10. Halos L, Beugnet F, Cardoso L, Farkas R, Franc M, Guillot J, et al. Flea control failure? Myths and realities. *Trends Parasitol*. 2014; 30(5):228–33. Epub 2014/03/26. <https://doi.org/10.1016/j.pt.2014.02.007> PMID: 24661796.
11. Ribeiro JMC, and Arca, B. From Sialomes to the Sialoverse: An Insight into Salivary Potion of Blood-Feeding Insects. *Adv Insect Physiol*. 2009;37.
12. Kamhawi S. The biological and immunomodulatory properties of sand fly saliva and its role in the establishment of *Leishmania* infections. *Microbes Infect*. 2000; 2(14):1765–73. Epub 2001/01/04. [https://doi.org/10.1016/s1286-4579\(00\)01331-9](https://doi.org/10.1016/s1286-4579(00)01331-9) PMID: 11137049.
13. Nazario S, Das S, de Silva AM, Deponte K, Marcantonio N, Anderson JF, et al. Prevention of *Borrelia burgdorferi* transmission in guinea pigs by tick immunity. *Am J Trop Med Hyg*. 1998; 58(6):780–5. Epub 1998/07/11. <https://doi.org/10.4269/ajtmh.1998.58.780> PMID: 9660463.
14. Sukumaran B, Narasimhan S, Anderson JF, DePonte K, Marcantonio N, Krishnan MN, et al. An *Ixodes scapularis* protein required for survival of *Anaplasma phagocytophilum* in tick salivary glands. *J Exp*

- Med. 2006; 203(6):1507–17. Epub 2006/05/24. <https://doi.org/10.1084/jem.20060208> PMID: 16717118; PubMed Central PMCID: PMC2118316.
15. Manning JE, Morens DM, Kamhawi S, Valenzuela JG, Memoli M. Mosquito Saliva: The Hope for a Universal Arbovirus Vaccine? *J Infect Dis*. 2018; 218(1):7–15. Epub 2018/04/05. <https://doi.org/10.1093/infdis/jiy179> PMID: 29617849; PubMed Central PMCID: PMC5989627.
  16. Cheeseman MT, Bates PA, Crampton JM. Preliminary characterisation of esterase and platelet-activating factor (PAF)-acetylhydrolase activities from cat flea (*Ctenocephalides felis*) salivary glands. *Insect Biochem Mol Biol*. 2001; 31(2):157–64. Epub 2001/02/13. [https://doi.org/10.1016/s0965-1748\(00\)00113-2](https://doi.org/10.1016/s0965-1748(00)00113-2) PMID: 11164337.
  17. Xu X, Zhang B, Yang S, An S, Ribeiro JM, Andersen JF. Structure and Function of FS50, a salivary protein from the flea *Xenopsylla cheopis* that blocks the sodium channel NaV1.5. *Sci Rep*. 2016; 6:36574. Epub 2016/11/08. <https://doi.org/10.1038/srep36574> PMID: 27819327; PubMed Central PMCID: PMC5098211.
  18. Deng Z, Zeng Q, Tang J, Zhang B, Chai J, Andersen JF, et al. Anti-inflammatory effects of FS48, the first potassium channel inhibitor from the salivary glands of the flea *Xenopsylla cheopis*. *J Biol Chem*. 2021; 296:100670. Epub 2021/04/18. <https://doi.org/10.1016/j.jbc.2021.100670> PMID: 33864815; PubMed Central PMCID: PMC8131326.
  19. Lu S, Tirloni L, Oliveira MB, Bosio CF, Nardone GA, Zhang Y, et al. Identification of a substrate-like cleavage-resistant thrombin inhibitor from the saliva of the flea *Xenopsylla cheopis*. *J Biol Chem*. 2021; 297(5):101322. Epub 2021/10/25. <https://doi.org/10.1016/j.jbc.2021.101322> PMID: 34688666; PubMed Central PMCID: PMC8573170.
  20. Driscoll TP, Verhoeve VI, Gillespie JJ, Johnston JS, Guillotte ML, Rennoll-Bankert KE, et al. A chromosome-level assembly of the cat flea genome uncovers rampant gene duplication and genome size plasticity. *BMC Biol*. 2020; 18(1):70. Epub 2020/06/21. <https://doi.org/10.1186/s12915-020-00802-7> PMID: 32560686; PubMed Central PMCID: PMC7305587.
  21. Ribeiro JM, Assumpcao TC, Ma D, Alvarenga PH, Pham VM, Andersen JF, et al. An insight into the salivary transcriptome of the cat flea, *Ctenocephalides felis*. *PLoS One*. 2012; 7(9):e44612. Epub 2012/10/11. <https://doi.org/10.1371/journal.pone.0044612> PMID: 23049752; PubMed Central PMCID: PMC3458046.
  22. Wade SE, Georgi JR. Survival and reproduction of artificially fed cat fleas, *Ctenocephalides felis* Bouche (Siphonaptera: Pulicidae). *J Med Entomol*. 1988; 25(3):186–90. Epub 1988/05/01. <https://doi.org/10.1093/jmedent/25.3.186> PMID: 3392715.
  23. Danchenko M, Laukaitis HJ, Macaluso KR. Dynamic gene expression in salivary glands of the cat flea during *Rickettsia felis* infection. *Pathog Dis*. 2021; 79(5). Epub 2021/03/27. <https://doi.org/10.1093/femspd/ftab020> PMID: 33770162; PubMed Central PMCID: PMC8062234.
  24. Simpson JT, Wong K, Jackman SD, Schein JE, Jones SJ, Birol I. ABySS: a parallel assembler for short read sequence data. *Genome Res*. 2009; 19(6):1117–23. Epub 2009/03/03. <https://doi.org/10.1101/gr.089532.108> PMID: 19251739; PubMed Central PMCID: PMC2694472.
  25. Grabherr MG, Haas BJ, Yassour M, Levin JZ, Thompson DA, Amit I, et al. Full-length transcriptome assembly from RNA-Seq data without a reference genome. *Nat Biotechnol*. 2011; 29(7):644–52. Epub 2011/05/17. <https://doi.org/10.1038/nbt.1883> PMID: 21572440; PubMed Central PMCID: PMC3571712.
  26. Fu L, Niu B, Zhu Z, Wu S, Li W. CD-HIT: accelerated for clustering the next-generation sequencing data. *Bioinformatics*. 2012; 28(23):3150–2. Epub 2012/10/13. <https://doi.org/10.1093/bioinformatics/bts565> PMID: 23060610; PubMed Central PMCID: PMC3516142.
  27. Bendtsen JD, Nielsen H, von Heijne G, Brunak S. Improved prediction of signal peptides: SignalP 3.0. *J Mol Biol*. 2004; 340(4):783–95. Epub 2004/06/30. <https://doi.org/10.1016/j.jmb.2004.05.028> PMID: 15223320.
  28. Seppely M, Manni M, Zdobnov EM. BUSCO: Assessing Genome Assembly and Annotation Completeness. *Methods Mol Biol*. 2019; 1962:227–45. Epub 2019/04/26. [https://doi.org/10.1007/978-1-4939-9173-0\\_14](https://doi.org/10.1007/978-1-4939-9173-0_14) PMID: 31020564.
  29. Li B, Dewey CN. RSEM: accurate transcript quantification from RNA-Seq data with or without a reference genome. *BMC Bioinformatics*. 2011; 12:323. Epub 2011/08/06. <https://doi.org/10.1186/1471-2105-12-323> PMID: 21816040; PubMed Central PMCID: PMC3163565.
  30. Carvalho PC, Lima DB, Leprevost FV, Santos MD, Fischer JS, Aquino PF, et al. Integrated analysis of shotgun proteomic data with PatternLab for proteomics 4.0. *Nat Protoc*. 2016; 11(1):102–17. Epub 2015/12/15. <https://doi.org/10.1038/nprot.2015.133> PMID: 26658470; PubMed Central PMCID: PMC5722229.
  31. Eng JK, Jahan TA, Hoopmann MR. Comet: an open-source MS/MS sequence database search tool. *Proteomics*. 2013; 13(1):22–4. Epub 2012/11/14. <https://doi.org/10.1002/pmic.201200439> PMID: 23148064.



32. Team RC. R: A Language and Environment for Statistical Computing. R Foundation for Statistical Computing. 2020.
33. NMaK S. Molecular Evolution and Phylogenetics: Oxford University Press; 2000. 333 p.
34. Kumar S, Stecher G, Li M, Knyaz C, Tamura K. MEGA X: Molecular Evolutionary Genetics Analysis across Computing Platforms. *Mol Biol Evol.* 2018; 35(6):1547–9. Epub 2018/05/04. <https://doi.org/10.1093/molbev/msy096> PMID: 29722887; PubMed Central PMCID: PMC5967553.
35. Madeira F, Park YM, Lee J, Buso N, Gur T, Madhusoodanan N, et al. The EMBL-EBI search and sequence analysis tools APIs in 2019. *Nucleic Acids Res.* 2019; 47(W1):W636–W41. Epub 2019/04/13. <https://doi.org/10.1093/nar/gkz268> PMID: 30976793; PubMed Central PMCID: PMC6602479.
36. Waterhouse R.M. SM, Simão F.A., Zdobnov E.M. Using BUSCO to Assess Insect Genomic Resources. Genomics. I, editor. New York, NY: Humana Press; 2019.
37. Lu S, Andersen JF, Bosio CF, Hinnebusch BJ, Ribeiro JMC. Integrated analysis of the sialotranscriptome and sialoproteome of the rat flea *Xenopsylla cheopis*. *J Proteomics.* 2022; 254:104476. Epub 2022/01/07. <https://doi.org/10.1016/j.jprot.2021.104476> PMID: 34990822; PubMed Central PMCID: PMC8883501.
38. Lu S, Martin-Martin I, Ribeiro JM, Calvo E. A deeper insight into the sialome of male and female *Ochlerotatus triseriatus* mosquitoes. *Insect Biochem Mol Biol.* 2022; 103800. Epub 2022/07/06. <https://doi.org/10.1016/j.ibmb.2022.103800> PMID: 35787945.
39. Tirloni L, Lu S, Calvo E, Sabadin G, Di Maggio LS, Suzuki M, et al. Integrated analysis of sialotranscriptome and sialoproteome of the brown dog tick *Rhipicephalus sanguineus* (s.l.): Insights into gene expression during blood feeding. *J Proteomics.* 2020; 229:103899. Epub 2020/07/17. <https://doi.org/10.1016/j.jprot.2020.103899> PMID: 32673754.
40. Ribeiro JM, Debat HJ, Boiani M, Ures X, Rocha S, Breijo M. An insight into the sialome, mialome and virome of the horn fly, *Haematobia irritans*. *BMC Genomics.* 2019; 20(1):616. Epub 2019/07/31. <https://doi.org/10.1186/s12864-019-5984-7> PMID: 31357943; PubMed Central PMCID: PMC6664567.
41. Scarpassa VM, Debat HJ, Alencar RB, Saraiva JF, Calvo E, Arca B, et al. An insight into the sialotranscriptome and virome of Amazonian anophelines. *BMC Genomics.* 2019; 20(1):166. Epub 2019/03/06. <https://doi.org/10.1186/s12864-019-5545-0> PMID: 30832587; PubMed Central PMCID: PMC6399984.
42. Frank G, Hunter S, Stiegler G, Wallenfels L, Kwochka K. Salivary allergens of *Ctenocephalides felis*: collection, purification and evaluation by intradermal skin testing in dogs. 1998.
43. Andersen JF, Hinnebusch BJ, Lucas DA, Conrads TP, Veenstra TD, Pham VM, et al. An insight into the sialome of the oriental rat flea, *Xenopsylla cheopis* (Rots). *BMC Genomics.* 2007; 8:102. Epub 2007/04/18. <https://doi.org/10.1186/1471-2164-8-102> PMID: 17437641; PubMed Central PMCID: PMC1876217.
44. McDermott MJ, Weber E, Hunter S, Stedman KE, Best E, Frank GR, et al. Identification, cloning, and characterization of a major cat flea salivary allergen (Cte f 1). *Mol Immunol.* 2000; 37(7):361–75. Epub 2000/11/14. [https://doi.org/10.1016/s0161-5890\(00\)00061-4](https://doi.org/10.1016/s0161-5890(00)00061-4) PMID: 11074254.
45. Lee SE, Jackson LA, Opdebeeck JP. Salivary antigens of the cat flea, *Ctenocephalides felis felis*. *Parasite Immunol.* 1997; 19(1):13–9. Epub 1997/01/01. <https://doi.org/10.1046/j.1365-3024.1997.d01-140.x> PMID: 9121836.
46. Mans BJ. Evolution of vertebrate hemostatic and inflammatory control mechanisms in blood-feeding arthropods. *J Innate Immun.* 2011; 3(1):41–51. Epub 2010/10/29. <https://doi.org/10.1159/000321599> PMID: 20980728.
47. Bontems F, Roumestand C, Gilquin B, Menez A, Toma F. Refined structure of charybdotoxin: common motifs in scorpion toxins and insect defensins. *Science.* 1991; 254(5037):1521–3. Epub 1991/12/06. <https://doi.org/10.1126/science.1720574> PMID: 1720574.
48. Zeng Q, Lu W, Deng Z, Zhang B, Wu J, Chai J, et al. The toxin mimic FS48 from the salivary gland of *Xenopsylla cheopis* functions as a Kv1.3 channel-blocking immunomodulator of T cell activation. *J Biol Chem.* 2022; 298(1):101497. Epub 2021/12/18. <https://doi.org/10.1016/j.jbc.2021.101497> PMID: 34919963; PubMed Central PMCID: PMC8732088.
49. Feske S, Wulff H, Skolnik EY. Ion channels in innate and adaptive immunity. *Annu Rev Immunol.* 2015; 33:291–353. Epub 2015/04/12. <https://doi.org/10.1146/annurev-immunol-032414-112212> PMID: 25861976; PubMed Central PMCID: PMC4822408.
50. Bennett DL, Clark AJ, Huang J, Waxman SG, Dib-Hajj SD. The Role of Voltage-Gated Sodium Channels in Pain Signaling. *Physiol Rev.* 2019; 99(2):1079–151. Epub 2019/01/24. <https://doi.org/10.1152/physrev.00052.2017> PMID: 30672368.
51. Vincent JB, Crowder MW, Averill BA. Hydrolysis of phosphate monoesters: a biological problem with multiple chemical solutions. *Trends Biochem Sci.* 1992; 17(3):105–10. Epub 1992/03/01. [https://doi.org/10.1016/0968-0004\(92\)90246-6](https://doi.org/10.1016/0968-0004(92)90246-6) PMID: 1412693.

52. Schenk G, Mitic N, Hanson GR, Comba P. Purple acid phosphatase: A journey into the function and mechanism of a colorful enzyme. *Coord Chem Rev*. 2013; 257(2):473–82. <https://doi.org/10.1016/j.ccr.2012.03.020> PubMed PMID: WOS:000312762200013.
53. Anhe AC, Lima-Oliveira AP, Azeredo-Oliveira MT. Acid phosphatase activity distribution in salivary glands of triatomines (Heteroptera, Reduviidae, Triatominae). *Genet Mol Res*. 2007; 6(1):197–205. Epub 2007/05/01. PMID: [17469069](https://pubmed.ncbi.nlm.nih.gov/17469069/).
54. Nunes ET, Camargo Mathias MI, Bechara GH. Rhipicephalus (Boophilus) microplus (Canestrini, 1887) (Acari: Ixodidae): acid phosphatase and ATPase activities localization in salivary glands of females during the feeding period. *Exp Parasitol*. 2006; 114(2):109–17. Epub 2006/04/21. <https://doi.org/10.1016/j.exppara.2006.02.022> PMID: [16624309](https://pubmed.ncbi.nlm.nih.gov/16624309/).
55. Andersen JFaR, J. M.C. Salivary Kratagonists: Scavengers of Host Physiological Effectors During Blood Feeding. *Vector Saliva-Host Pathogen Interactions*. 2: Academic Press; 2017. p. 51–63.
56. Calvo E, Mans BJ, Andersen JF, Ribeiro JM. Function and evolution of a mosquito salivary protein family. *J Biol Chem*. 2006; 281(4):1935–42. Epub 2005/11/23. <https://doi.org/10.1074/jbc.M510359200> PMID: [16301315](https://pubmed.ncbi.nlm.nih.gov/16301315/).
57. Andersen JF, Gudderra NP, Francischetti IM, Ribeiro JM. The role of salivary lipocalins in blood feeding by *Rhodnius prolixus*. *Arch Insect Biochem Physiol*. 2005; 58(2):97–105. Epub 2005/01/22. <https://doi.org/10.1002/arch.20032> PMID: [15660358](https://pubmed.ncbi.nlm.nih.gov/15660358/); PubMed Central PMCID: [PMC2915583](https://pubmed.ncbi.nlm.nih.gov/PMC2915583/).
58. Mans BJ, Ribeiro JM, Andersen JF. Structure, function, and evolution of biogenic amine-binding proteins in soft ticks. *J Biol Chem*. 2008; 283(27):18721–33. Epub 2008/05/01. <https://doi.org/10.1074/jbc.M800188200> PMID: [18445596](https://pubmed.ncbi.nlm.nih.gov/18445596/); PubMed Central PMCID: [PMC2441560](https://pubmed.ncbi.nlm.nih.gov/PMC2441560/).
59. Calvo E, Mans BJ, Ribeiro JM, Andersen JF. Multifunctionality and mechanism of ligand binding in a mosquito antiinflammatory protein. *Proc Natl Acad Sci U S A*. 2009; 106(10):3728–33. Epub 2009/02/24. <https://doi.org/10.1073/pnas.0813190106> PMID: [19234127](https://pubmed.ncbi.nlm.nih.gov/19234127/); PubMed Central PMCID: [PMC2656148](https://pubmed.ncbi.nlm.nih.gov/PMC2656148/).
60. Spitzova T, Sumova P, Volfova V, Polanska N, Pochtova L, Volf P. Interactions between host biogenic amines and sand fly salivary yellow-related proteins. *Parasit Vectors*. 2020; 13(1):237. Epub 2020/05/10. <https://doi.org/10.1186/s13071-020-04105-2> PMID: [32381071](https://pubmed.ncbi.nlm.nih.gov/32381071/); PubMed Central PMCID: [PMC7206685](https://pubmed.ncbi.nlm.nih.gov/PMC7206685/).
61. Gibney G, Camp S, Dionne M, MacPhee-Quigley K, Taylor P. Mutagenesis of essential functional residues in acetylcholinesterase. *Proc Natl Acad Sci U S A*. 1990; 87(19):7546–50. Epub 1990/10/01. <https://doi.org/10.1073/pnas.87.19.7546> PMID: [2217185](https://pubmed.ncbi.nlm.nih.gov/2217185/); PubMed Central PMCID: [PMC54784](https://pubmed.ncbi.nlm.nih.gov/PMC54784/).
62. Krejci E, Duval N, Chatonnet A, Vincens P, Massoulie J. Cholinesterase-like domains in enzymes and structural proteins: functional and evolutionary relationships and identification of a catalytically essential aspartic acid. *Proc Natl Acad Sci U S A*. 1991; 88(15):6647–51. Epub 1991/08/01. <https://doi.org/10.1073/pnas.88.15.6647> PMID: [1862088](https://pubmed.ncbi.nlm.nih.gov/1862088/); PubMed Central PMCID: [PMC52145](https://pubmed.ncbi.nlm.nih.gov/PMC52145/).
63. Temeyer KB, Schlechte KG, Olafson PU, Drolet BS, Tidwell JP, Osbrink WLA, et al. Association of Salivary Cholinesterase With Arthropod Vectors of Disease. *J Med Entomol*. 2020; 57(6):1679–85. Epub 2020/05/28. <https://doi.org/10.1093/jme/tjaa096> PMID: [32459332](https://pubmed.ncbi.nlm.nih.gov/32459332/).
64. Francischetti IM, Calvo E, Andersen JF, Pham VM, Favreau AJ, Barbian KD, et al. Insight into the Sialome of the Bed Bug, *Cimex lectularius*. *J Proteome Res*. 2010; 9(8):3820–31. Epub 2010/05/06. <https://doi.org/10.1021/pr1000169> PMID: [20441151](https://pubmed.ncbi.nlm.nih.gov/20441151/); PubMed Central PMCID: [PMC2917537](https://pubmed.ncbi.nlm.nih.gov/PMC2917537/).
65. Kim JH, Hwang CE, Yoon KA, Seong KM, Lee J, Kim JH, et al. Molecular and biochemical characterization of the bed bug salivary gland cholinesterase as an acetylcholine-sequestering enzyme. *Insect Biochem Mol Biol*. 2018; 102:52–8. Epub 2018/09/30. <https://doi.org/10.1016/j.ibmb.2018.09.009> PMID: [30266661](https://pubmed.ncbi.nlm.nih.gov/30266661/).
66. Cox MA, Bassi C, Saunders ME, Nechanitzky R, Morgado-Palacin I, Zheng C, et al. Beyond neurotransmission: acetylcholine in immunity and inflammation. *J Intern Med*. 2020; 287(2):120–33. Epub 2019/11/12. <https://doi.org/10.1111/joim.13006> PMID: [31710126](https://pubmed.ncbi.nlm.nih.gov/31710126/).
67. Abraham A, Chandler DE. Tracing the Evolutionary History of the CAP Superfamily of Proteins Using Amino Acid Sequence Homology and Conservation of Splice Sites. *J Mol Evol*. 2017; 85(3–4):137–57. Epub 2017/10/27. <https://doi.org/10.1007/s00239-017-9813-9> PMID: [29071358](https://pubmed.ncbi.nlm.nih.gov/29071358/).
68. Lu G, Villalba M, Coscia MR, Hoffman DR, King TP. Sequence analysis and antigenic cross-reactivity of a venom allergen, antigen 5, from hornets, wasps, and yellow jackets. *J Immunol*. 1993; 150(7):2823–30. Epub 1993/04/01. PMID: [8454859](https://pubmed.ncbi.nlm.nih.gov/8454859/).
69. Yamazaki Y, Morita T. Structure and function of snake venom cysteine-rich secretory proteins. *Toxicon*. 2004; 44(3):227–31. Epub 2004/08/11. <https://doi.org/10.1016/j.toxicon.2004.05.023> PMID: [15302528](https://pubmed.ncbi.nlm.nih.gov/15302528/).
70. Ribeiro JM, Slovak M, Francischetti IM. An insight into the sialome of *Hyalomma excavatum*. *Ticks Tick Borne Dis*. 2017; 8(2):201–7. Epub 2017/01/05. <https://doi.org/10.1016/j.ttbdis.2016.08.011> PMID: [28049606](https://pubmed.ncbi.nlm.nih.gov/28049606/); PubMed Central PMCID: [PMC5248969](https://pubmed.ncbi.nlm.nih.gov/PMC5248969/).

71. Charlab R, Valenzuela JG, Rowton ED, Ribeiro JM. Toward an understanding of the biochemical and pharmacological complexity of the saliva of a hematophagous sand fly *Lutzomyia longipalpis*. *Proc Natl Acad Sci U S A*. 1999; 96(26):15155–60. Epub 1999/12/28. <https://doi.org/10.1073/pnas.96.26.15155> PMID: 10611354; PubMed Central PMCID: PMC24789.
72. Calvo E, Dao A, Pham VM, Ribeiro JM. An insight into the sialome of *Anopheles funestus* reveals an emerging pattern in anopheline salivary protein families. *Insect Biochem Mol Biol*. 2007; 37(2):164–75. Epub 2007/01/25. <https://doi.org/10.1016/j.ibmb.2006.11.005> PMID: 17244545; PubMed Central PMCID: PMC1853278.
73. Assumpcao TCF, Ma D, Schwarz A, Reiter K, Santana JM, Andersen JF, et al. Salivary antigen-5/CAP family members are Cu<sup>2+</sup>-dependent antioxidant enzymes that scavenge O<sub>2</sub>(-). and inhibit collagen-induced platelet aggregation and neutrophil oxidative burst. *J Biol Chem*. 2013; 288(20):14341–61. Epub 2013/04/09. <https://doi.org/10.1074/jbc.M113.466995> PMID: 23564450; PubMed Central PMCID: PMC3656290.
74. Ma D, Wang Y, Yang H, Wu J, An S, Gao L, et al. Anti-thrombosis repertoire of blood-feeding horsefly salivary glands. *Mol Cell Proteomics*. 2009; 8(9):2071–9. Epub 2009/06/18. <https://doi.org/10.1074/mcp.M900186-MCP200> PMID: 19531497; PubMed Central PMCID: PMC2742439.
75. Ma D, Gao L, An S, Song Y, Wu J, Xu X, et al. A horsefly saliva antigen 5-like protein containing RTS motif is an angiogenesis inhibitor. *Toxicon*. 2010; 55(1):45–51. Epub 2009/07/29. <https://doi.org/10.1016/j.toxicon.2009.06.038> PMID: 19635491.
76. Ribeiro JM, Martin-Martin I, Arca B, Calvo E. A Deep Insight into the Sialome of Male and Female *Aedes aegypti* Mosquitoes. *PLoS One*. 2016; 11(3):e0151400. Epub 2016/03/22. <https://doi.org/10.1371/journal.pone.0151400> PMID: 26999592; PubMed Central PMCID: PMC4801386.
77. Assumpção TC, Ma D, Schwarz A, Reiter K, Santana JM, Andersen JF, et al. Salivary antigen-5/CAP family members are Cu<sup>2+</sup>-dependent antioxidant enzymes that scavenge O<sub>2</sub> and inhibit collagen-induced platelet aggregation and neutrophil oxidative burst. *Journal of Biological Chemistry*. 2013; 288(20):14341–61.
78. Ribeiro JMC, Martin-Martin I, Moreira FR, Bernard KA, Calvo E. A deep insight into the male and female sialotranscriptome of adult *Culex tarsalis* mosquitoes. *Insect biochemistry and molecular biology*. 2018; 95:1–9. Epub 2018/03/13. <https://doi.org/10.1016/j.ibmb.2018.03.001> PMID: 29526772; PubMed Central PMCID: PMC5927831.
79. Plesner L. Ecto-ATPases: identities and functions. *Int Rev Cytol*. 1995; 158:141–214. Epub 1995/01/01. [https://doi.org/10.1016/s0074-7696\(08\)62487-0](https://doi.org/10.1016/s0074-7696(08)62487-0) PMID: 7721538.
80. Mans BJ, Gasper AR, Louw AI, Neitz AW. Purification and characterization of apyrase from the tick, *Ornithodoros savignyi*. *Comp Biochem Physiol B Biochem Mol Biol*. 1998; 120(3):617–24. Epub 2003/11/06. [https://doi.org/10.1016/s0305-0491\(98\)10061-5](https://doi.org/10.1016/s0305-0491(98)10061-5) PMID: 14598857.
81. Sarkis JJ, Guimaraes JA, Ribeiro JM. Salivary apyrase of *Rhodnius prolixus*. Kinetics and purification. *Biochem J*. 1986; 233(3):885–91. Epub 1986/02/01. <https://doi.org/10.1042/bj2330885> PMID: 3010945; PubMed Central PMCID: PMC1153112.
82. Ribeiro JM, Sarkis JJ, Rossignol PA, Spielman A. Salivary apyrase of *Aedes aegypti*: characterization and secretory fate. *Comp Biochem Physiol B*. 1984; 79(1):81–6. Epub 1984/01/01. [https://doi.org/10.1016/0305-0491\(84\)90081-6](https://doi.org/10.1016/0305-0491(84)90081-6) PMID: 6094095.
83. Ribeiro JM, Nussenzveig RH, Tortorella G. Salivary vasodilators of *Aedes triseriatus* and *Anopheles gambiae* (Diptera: Culicidae). *J Med Entomol*. 1994; 31(5):747–53. Epub 1994/09/01. <https://doi.org/10.1093/jmedent/31.5.747> PMID: 7966179.
84. Cheeseman MT. Characterization of apyrase activity from the salivary glands of the cat flea *Ctenocephalides felis*. *Insect Biochem Mol Biol*. 1998; 28(12):1025–30. Epub 1999/01/15. [https://doi.org/10.1016/s0965-1748\(98\)00093-9](https://doi.org/10.1016/s0965-1748(98)00093-9) PMID: 9887518.
85. Ribeiro JM, Vaughan JA, Azad AF. Characterization of the salivary apyrase activity of three rodent flea species. *Comp Biochem Physiol B*. 1990; 95(2):215–9. Epub 1990/01/01. [https://doi.org/10.1016/0305-0491\(90\)90067-4](https://doi.org/10.1016/0305-0491(90)90067-4) PMID: 2158411.
86. Hughes AL. Evolution of the salivary apyrases of blood-feeding arthropods. *Gene*. 2013; 527(1):123–30. Epub 2013/06/25. <https://doi.org/10.1016/j.gene.2013.05.087> PMID: 23791653.
87. Ribeiro JM, Makoul GT, Levine J, Robinson DR, Spielman A. Antihemostatic, antiinflammatory, and immunosuppressive properties of the saliva of a tick, *Ixodes dammini*. *J Exp Med*. 1985; 161(2):332–44. Epub 1985/02/01. <https://doi.org/10.1084/jem.161.2.332> PMID: 2982989; PubMed Central PMCID: PMC2187567.
88. Valenzuela JG, Charlab R, Galperin MY, Ribeiro JM. Purification, cloning, and expression of an apyrase from the bed bug *Cimex lectularius*. A new type of nucleotide-binding enzyme. *J Biol Chem*. 1998; 273(46):30583–90. Epub 1998/11/07. <https://doi.org/10.1074/jbc.273.46.30583> PMID: 9804829.

89. Ribeiro JM, Rowton ED, Charlab R. The salivary 5'-nucleotidase/phosphodiesterase of the hematophagous sand lutzomyia fly, *Lutzomyia longipalpis*. *Insect biochemistry and molecular biology*. 2000; 30(4):279–85.
90. Stark KR, James AA. Salivary gland anticoagulants in culicine and anopheline mosquitoes (Diptera: Culicidae). *J Med Entomol*. 1996; 33(4):645–50. Epub 1996/07/01. <https://doi.org/10.1093/jmedent/33.4.645> PMID: 8699461.
91. Martins LA, Kotal J, Bensaoud C, Chmelar J, Kotsyfakis M. Small protease inhibitors in tick saliva and salivary glands and their role in tick-host-pathogen interactions. *Biochim Biophys Acta Proteins Proteom*. 2020; 1868(2):140336. Epub 2019/12/10. <https://doi.org/10.1016/j.bbapap.2019.140336> PMID: 31816416.
92. Collin N, Assumpcao TC, Mizurini DM, Gilmore DC, Dutra-Oliveira A, Kotsyfakis M, et al. Lufaxin, a novel factor Xa inhibitor from the salivary gland of the sand fly *Lutzomyia longipalpis* blocks protease-activated receptor 2 activation and inhibits inflammation and thrombosis in vivo. *Arterioscler Thromb Vasc Biol*. 2012; 32(9):2185–98. Epub 2012/07/17. <https://doi.org/10.1161/ATVBAHA.112.253906> PMID: 22796577; PubMed Central PMCID: PMC3421056.
93. Noeske-Jungblut C, Haendler B, Donner P, Alagon A, Possani L, Schleuning WD. Triabin, a highly potent exosite inhibitor of thrombin. *J Biol Chem*. 1995; 270(48):28629–34. Epub 1995/12/01. <https://doi.org/10.1074/jbc.270.48.28629> PMID: 7499380.
94. Fan J, Francis F, Liu Y, Chen JL, Cheng DF. An overview of odorant-binding protein functions in insect peripheral olfactory reception. *Genet Mol Res*. 2011; 10(4):3056–69. Epub 2011/12/20. <https://doi.org/10.4238/2011.December.8.2> PMID: 22180039.
95. Sandler BH, Nikonova L, Leal WS, Clardy J. Sexual attraction in the silkworm moth: structure of the pheromone-binding-protein-bombykol complex. *Chem Biol*. 2000; 7(2):143–51. Epub 2000/02/09. [https://doi.org/10.1016/s1074-5521\(00\)00078-8](https://doi.org/10.1016/s1074-5521(00)00078-8) PMID: 10662696.
96. Zwiebel LJ, Takken W. Olfactory regulation of mosquito-host interactions. *Insect Biochem Mol Biol*. 2004; 34(7):645–52. Epub 2004/07/10. <https://doi.org/10.1016/j.ibmb.2004.03.017> PMID: 15242705; PubMed Central PMCID: PMC3100215.
97. Jablonka W, Kim IH, Alvarenga PH, Valenzuela JG, Ribeiro JMC, Andersen JF. Functional and structural similarities of D7 proteins in the independently-evolved salivary secretions of sand flies and mosquitoes. *Sci Rep*. 2019; 9(1):5340. Epub 2019/03/31. <https://doi.org/10.1038/s41598-019-41848-0> PMID: 30926880; PubMed Central PMCID: PMC6440969.
98. Alvarenga PH, Francischetti IM, Calvo E, Sa-Nunes A, Ribeiro JM, Andersen JF. The function and three-dimensional structure of a thromboxane A2/cysteinyl leukotriene-binding protein from the saliva of a mosquito vector of the malaria parasite. *PLoS Biol*. 2010; 8(11):e1000547. Epub 2010/12/15. <https://doi.org/10.1371/journal.pbio.1000547> PMID: 21152418; PubMed Central PMCID: PMC2994686.
